# Supplementary material for: Assembling CeO2nanoparticles on ZIF-8viathe hydrothermal method to promote the CO2photoreduction performance
Source: Royal Society of Chemistry journal article supplement (doi:10.1039/d3dt00021d), 2023-01-01
Supplement: d3dt00021d1.pdf [file d3dt00021d1.pdf]

## Supporting Information

### Assembling CeO<sub>2</sub> nanoparticles on ZIF-8 via hydrothermal method to promote CO<sub>2</sub> photoreduction performances

Yuxin Zhang, Feifan Lang\*, Yujie Zhao, Hongwei Hou\*

Green Catalysis Center and College of Chemistry, Zhengzhou University, Zhengzhou, 450000, P. R. China  
E-mail: [huhongw@zzu.edu.cn](mailto:huhongw@zzu.edu.cn); [flang\\_cn@foxmail.com](mailto:flang_cn@foxmail.com)

**CeO<sub>2</sub> content calculation.** The CeO<sub>2</sub> content for the ZIF-8@CeO<sub>2</sub> composites was measured using thermogravimetric analysis.

**For the ZIF-8:**

$$\frac{m(\text{ZnO})}{m(\text{ZIF-8})} = 37.54\%$$

$$m(\text{ZnO}) = 0.3754 \times m(\text{ZIF-8})$$

**For the ZIF-8@CeO<sub>2</sub>:**

$$\frac{m(\text{ZnO}) + m(\text{CeO}_2)}{m(\text{ZIF-8}) + m(\text{CeO}_2)} = 59.81\%$$

$$\frac{0.3754 \times m(\text{ZIF-8}) + m(\text{CeO}_2)}{m(\text{ZIF-8}) + m(\text{CeO}_2)} = 59.81\%$$

$$0.3754 \times m(\text{ZIF-8}) + m(\text{CeO}_2) = 0.5981 \times (m(\text{ZIF-8}) + m(\text{CeO}_2))$$

$$0.4019 \times m(\text{CeO}_2) = 0.2227 \times m(\text{ZIF-8})$$

$$m(\text{CeO}_2) = 0.55 \times m(\text{ZIF-8})$$

$$\frac{m(\text{CeO}_2)}{m(\text{ZIF-8@CeO}_2)} = \frac{m(\text{CeO}_2)}{m(\text{ZIF-8}) + m(\text{CeO}_2)} = \frac{0.55 \times m(\text{ZIF-8})}{m(\text{ZIF-8}) + 0.55 \times m(\text{ZIF-8})} = \frac{0.55}{1 + 0.55} = 35\%$$

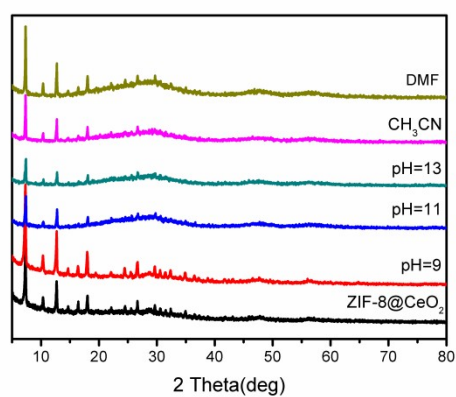

Fig. S1 XRD patterns of the sample ZIF-8@CeO<sub>2</sub> in water with varied pH, or common solvents.

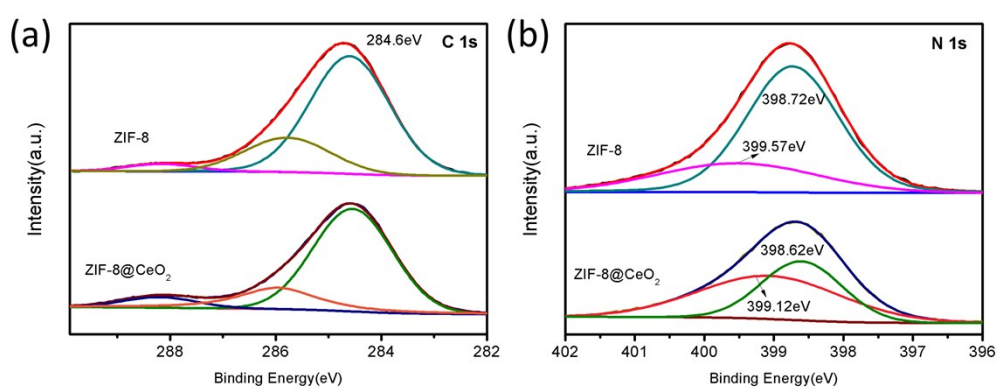

Fig. S2 High-resolution XPS spectra of (a) C 1s and (b) N 1s for samples respectively.

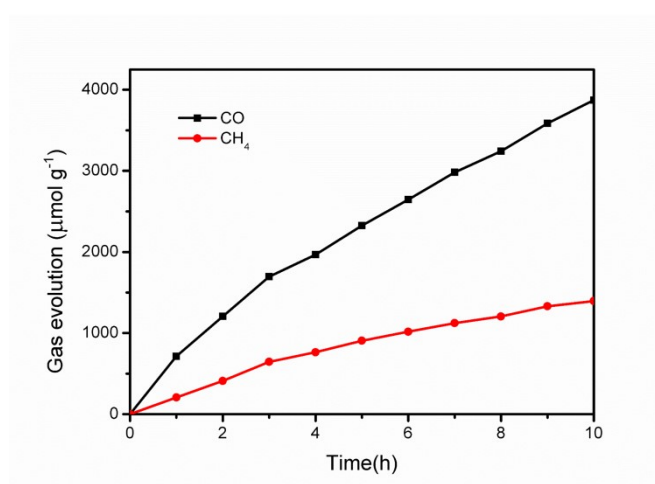

Fig. S3 The long-time performance test of the ZIF-8@CeO<sub>2</sub>.

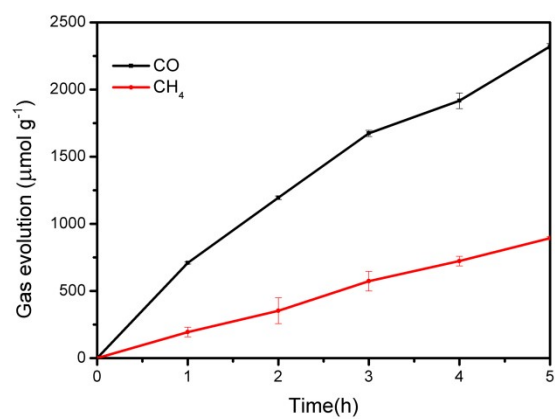

Fig. S4 The error bar of ZIF-8@CeO<sub>2</sub> performance test.

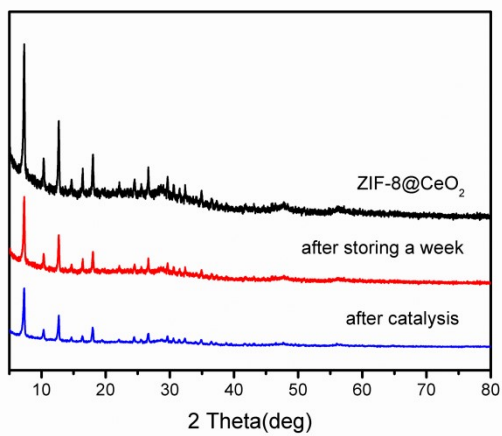

Fig. S5 XRD patterns of the sample pristine ZIF-8@CeO<sub>2</sub>, ZIF-8@CeO<sub>2</sub> after storing without protecting from natural light and ZIF-8@CeO<sub>2</sub> after catalysis.

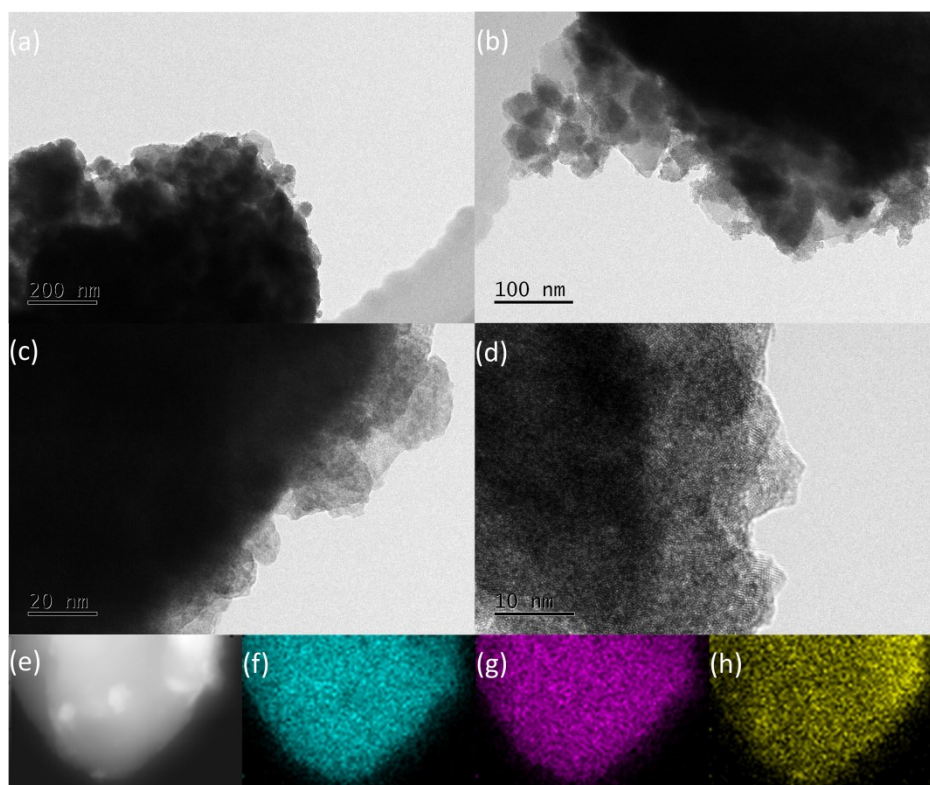

Fig. S6 (a) and (b) The TEM image of the used ZIF-8@CeO<sub>2</sub> composite, (c) and (d) High-magnification TEM image of the used ZIF-8@CeO<sub>2</sub>, (e) Scanning TEM image and EDS mapping analysis of (f) Zn (blue), (g) Ce (purple) and (h) O (yellow) of the used ZIF-8@CeO<sub>2</sub>.

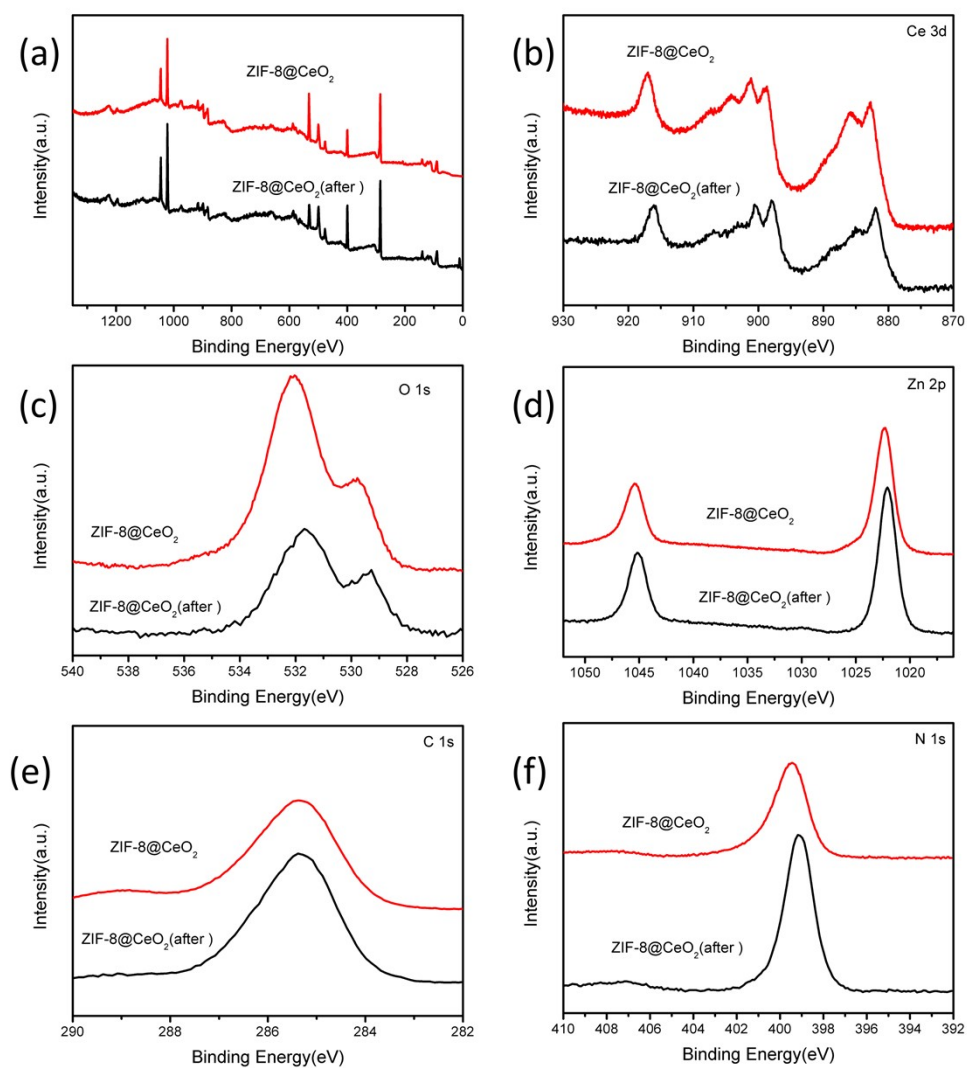

Fig.S7 XPS spectra of ZIF-8@CeO<sub>2</sub> before and after photocatalytic CO<sub>2</sub> reduction reactions.

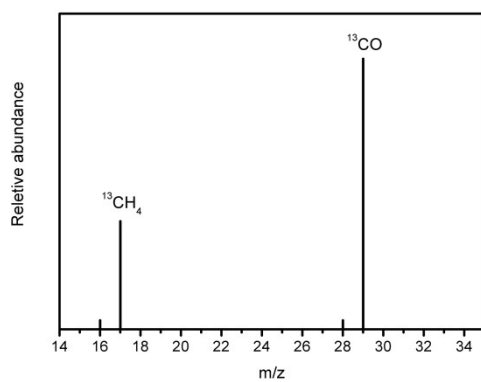

Fig.S8 The mass spectra of <sup>13</sup>CH<sub>4</sub> and <sup>13</sup>CO generated under <sup>13</sup>CO<sub>2</sub> atmosphere.

Table S1 Ce 3d XPS data CeO<sub>2</sub> and ZIF-8@CeO<sub>2</sub>.

| Sample                 | Ce <sup>3+</sup> / (Ce <sup>3+</sup> + Ce <sup>4+</sup> ) | Ce <sup>4+</sup> / (Ce <sup>3+</sup> +Ce <sup>4+</sup> ) |
|------------------------|-----------------------------------------------------------|----------------------------------------------------------|
| CeO <sub>2</sub>       | 18.96%                                                    | 81.04%                                                   |
| ZIF-8@CeO <sub>2</sub> | 22.76%                                                    | 77.24%                                                   |

Table S2 A series of control experiments based on reaction conditions<sup>[a]</sup>

| Catalyst    | Solvent            | Sacrificial agent | Source of radiation     | Reaction        | CO/ $\mu\text{mol g}^{-1} \text{h}^{-1}$ | CH <sub>4</sub> / $\mu\text{mol g}^{-1} \text{h}^{-1}$ |
|-------------|--------------------|-------------------|-------------------------|-----------------|------------------------------------------|--------------------------------------------------------|
| ZIF-8       | H <sub>2</sub> O   | TEOA              | 200nm< $\lambda$ <800nm | CO <sub>2</sub> | 378.86                                   | 138.64                                                 |
| ZIF-8       | H <sub>2</sub> O   | TEOA              | in the dark             | CO <sub>2</sub> | n.d <sup>[a]</sup>                       | n.d                                                    |
| ZIF-8       | H <sub>2</sub> O   | TEOA              | 200nm< $\lambda$ <800nm | Ar              | n.d                                      | n.d                                                    |
| ZIF-8       | H <sub>2</sub> O   | —                 | 200nm< $\lambda$ <800nm | CO <sub>2</sub> | 11.80                                    | n.d                                                    |
| ZIF-8       | H <sub>2</sub> O   | TEA               | 200nm< $\lambda$ <800nm | CO <sub>2</sub> | 10.78                                    | n.d                                                    |
| ZIF-8       | CH <sub>3</sub> CN | TEOA              | 200nm< $\lambda$ <800nm | CO <sub>2</sub> | 9.48                                     | n.d                                                    |
| —           | H <sub>2</sub> O   | TEOA              | 200nm< $\lambda$ <800nm | CO <sub>2</sub> | 122.73                                   | 38.39                                                  |
| MOF-808     | H <sub>2</sub> O   | TEOA              | 200nm< $\lambda$ <800nm | CO <sub>2</sub> | 275.68                                   | 109.05                                                 |
| MIL-101(Cr) | H <sub>2</sub> O   | TEOA              | 200nm< $\lambda$ <800nm | CO <sub>2</sub> | 427.52                                   | 137.20                                                 |
| ZIF-67      | H <sub>2</sub> O   | TEOA              | 200nm< $\lambda$ <800nm | CO <sub>2</sub> | 378.63                                   | 136.89                                                 |

[a]Not detectable.

Table S3 A series of control experiments of ZIF-8@CeO<sub>2</sub> based on reaction conditions.

| Catalyst                                       | Solvent          | Sacrificial agent | Source of radiation     | Reaction        | CO/ $\mu\text{mol g}^{-1} \text{h}^{-1}$ | CH <sub>4</sub> / $\mu\text{mol g}^{-1} \text{h}^{-1}$ |
|------------------------------------------------|------------------|-------------------|-------------------------|-----------------|------------------------------------------|--------------------------------------------------------|
| ZIF-8@CeO <sub>2</sub>                         | H <sub>2</sub> O | TEOA              | 200nm< $\lambda$ <800nm | CO <sub>2</sub> | 465.01                                   | 181.27                                                 |
| ZIF-8@CeO <sub>2</sub>                         | H <sub>2</sub> O | TEOA              | in the dark             | CO <sub>2</sub> | n.d <sup>[a]</sup>                       | n.d                                                    |
| ZIF-8@CeO <sub>2</sub>                         | H <sub>2</sub> O | TEOA              | 200nm< $\lambda$ <800nm | Ar              | n.d                                      | n.d                                                    |
| Physical mixture of ZIF-8 and CeO <sub>2</sub> | H <sub>2</sub> O | TEOA              | 200nm< $\lambda$ <800nm | CO <sub>2</sub> | 306.04                                   | 114.79                                                 |

[a]Not detectable.

Table S4 The CO<sub>2</sub> photoreduction performance compared with reported works.

| Photocatalyst                | Light source/ Solvent/<br>Sacrificial agent | Major products<br>evolution rate                                                                                                                                      | Reference                                                      |
|------------------------------|---------------------------------------------|-----------------------------------------------------------------------------------------------------------------------------------------------------------------------|----------------------------------------------------------------|
| CeO <sub>2</sub> @ZIF-8      | H <sub>2</sub> O/TEOA=5:1                   | CO 465.01 μmol g <sup>-1</sup> h <sup>-1</sup><br>CH <sub>4</sub> 181.27 μmol g <sup>-1</sup> h <sup>-1</sup>                                                         | This study                                                     |
| TiO <sub>2</sub> /AuCu/ZIF-8 | H <sub>2</sub> O                            | CO 82.99 μmol g <sup>-1</sup> h <sup>-1</sup><br>CH <sub>4</sub> 3.91 μmol g <sup>-1</sup> h <sup>-1</sup>                                                            | <i>Nano Energy</i> 62<br>(2019) 426–433                        |
| ZIF-8@TiO <sub>2</sub>       | H <sub>2</sub> O(g)                         | CO 10.512 μmol g <sup>-1</sup> h <sup>-1</sup><br>H <sub>2</sub> 7.2 μmol g <sup>-1</sup> h <sup>-1</sup>                                                             | <i>Applied Catalysis B: Environmental</i> 270<br>(2020) 118856 |
| CeO <sub>2</sub> /ATP        | NaOH solution<br>/CH <sub>3</sub> CN        | CO 309.44 μmol g <sup>-1</sup> h <sup>-1</sup><br>CH <sub>4</sub> 184.33 μmol g <sup>-1</sup> h <sup>-1</sup>                                                         | <i>Catal. Sci. Technol.</i> ,<br>2019, 9, 3788–3799<br>/ 3795  |
| Co-ZIF-9/TiO <sub>2</sub>    | H <sub>2</sub> O(g)                         | CO 17.58 μmol g <sup>-1</sup> h <sup>-1</sup><br>CH <sub>4</sub> 1.98 μmol g <sup>-1</sup> h <sup>-1</sup><br>H <sub>2</sub> 2.6 μmol g <sup>-1</sup> h <sup>-1</sup> | <i>J. Mater. Chem. A</i> ,<br>2016, 4, 15126–<br>15133         |
| TiO <sub>2</sub> /UiO-66     | H <sub>2</sub> O(g)                         | CO 1.9 μmol g <sup>-1</sup> h <sup>-1</sup><br>CH <sub>4</sub> 17.9 μmol g <sup>-1</sup> h <sup>-1</sup>                                                              | <i>Applied Catalysis B: Environmental</i> 270<br>(2020) 118856 |
| ZnO/ZIF-8                    | H <sub>2</sub> O                            | CH <sub>3</sub> OH 6843 μmol g <sup>-1</sup> h <sup>-1</sup>                                                                                                          | <i>Journal of CO2 Utilization</i> 43 (2021)<br>101373          |
| Ni@CdS@Zn/Co-ZIF-8           | H <sub>2</sub> O/TEOA                       | CO 307.9 μmol g <sup>-1</sup> h <sup>-1</sup><br>H <sub>2</sub> 1731.4 μmol g <sup>-1</sup> h <sup>-1</sup>                                                           | <i>ACS Appl. Mater. Interfaces</i> 2022, 14,<br>28123–28132    |
